# Supplementary material for: Regulation of Aldo-keto-reductase family 1 B10 by 14-3-3ε and their prognostic impact of hepatocellular carcinoma
Source: PubMed Central journal article supplement (PMC4770750; doi:10.18632/oncotarget.5734), 2015-10-19
Supplement: oncotarget-06-38967-s001.pdf [file oncotarget-06-38967-s001.pdf]

## SUPPLEMENTARY FIGURES AND TABLES

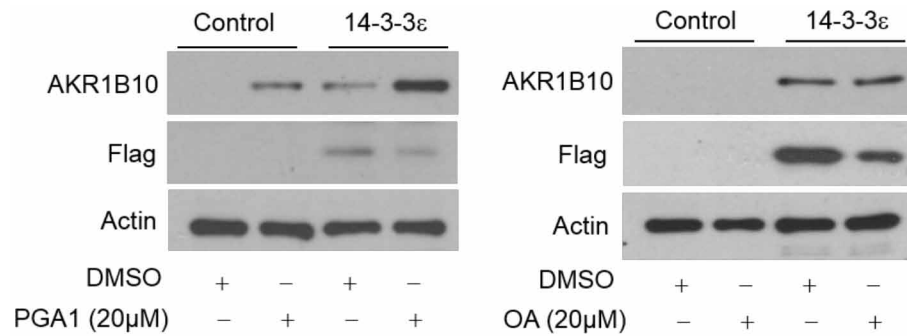

**Supplementary Figure S1: Effect of prostaglandin A1 (PGA1) and oleanolic acid (OA) on AKR1B10 expression.** Control and 14-3-3ε overexpressed stable cells were treated with PGA1 (left panel) and OA (right panel) for 24 hrs. AKR1B10 and flag expressions were determined by Western blot analysis. Actin was used as loading control.

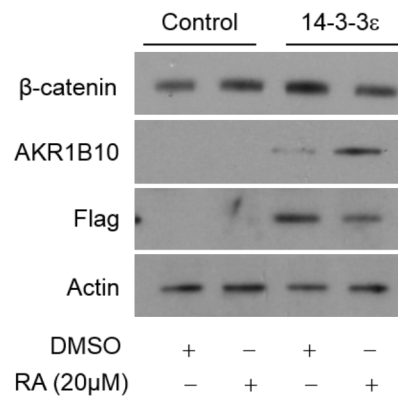

**Supplementary Figure S2: Effect of retinoic acid (RA) on AKR1B10 expression.** Control and 14-3-3ε overexpressed stable cells were treated with RA for 24 hrs. β-catenin, AKR1B10 and flag expressions were determined by Western blot analysis. Actin was used as loading control.

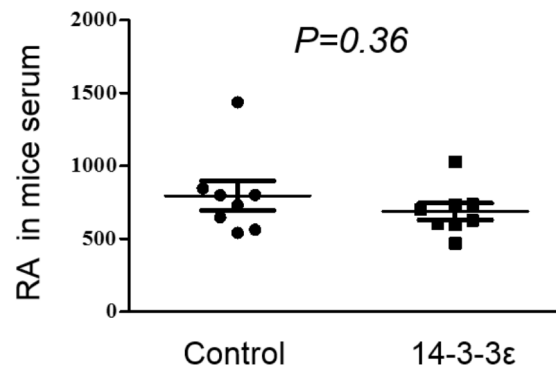

Supplementary Figure S3: Retinoic acid levels in sera from mice injected with control and 14-3-3ε overexpressed stable cells.

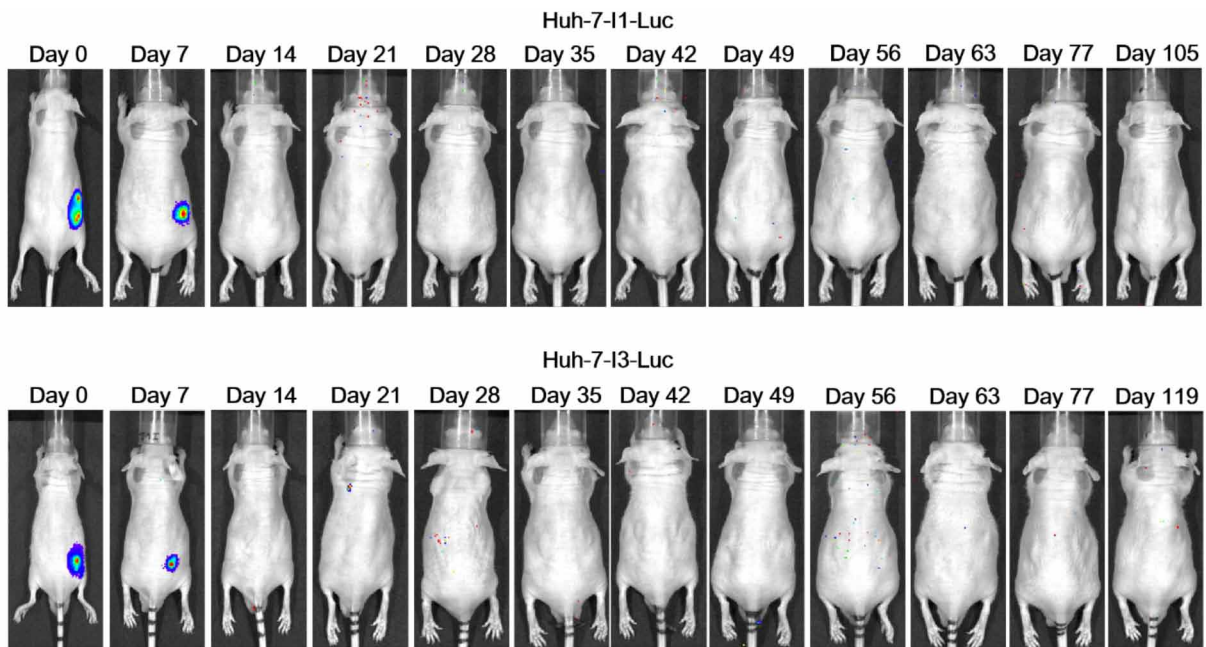

|          | Tumor incidence |
|----------|-----------------|
| Huh-7-I1 | 0/2             |
| Huh-7-I3 | 0/2             |

Supplementary Figure S4: Highly invasive Huh-7 cells (Huh-7-I1 and Huh-7-I3) expressing luciferase were established by transfection with luciferase, followed by selection with G418 for four weeks. Selected cells were injected into nude mice and the tumor incidence was examined.

**Supplementary Table S1: Oligonucleotide sequences for RT-PCR**

| Gene     | Primer Sequences                                                        |
|----------|-------------------------------------------------------------------------|
| Cyclin A | F 5'-TGAACCTACATTGATAGGTTTCCTGT-3'<br>Rv 5'-TGACTGTTGTGCATGCTGTGGTGC-3' |
| Cyclin D | Fw 5'-GCCAACCTCCTCAACGACCGG-3'<br>Rv 5'-GTCCATGTTCTGCTGGGCCTG-3'        |
| Cyclin E | Fw 5'-ATAATGCAGTCTGTGCAGAC-3'<br>Rv 5'-GTTGTGTGCATCTTCATCAG-3'          |
| AKR1B10  | Fw 5'-AGCTTGGCTAAAATGGGACA-3'<br>Rv 5'-AACGTGTTGCAATCCTCTCA-3'          |

**Supplementary Table S2: Oligonucleotide sequences for siRNAs**

| Accession no. | Gene name             | siRNA sequence                                                           |
|---------------|-----------------------|--------------------------------------------------------------------------|
| NM_006761.4   | YWHAE<br>(14-3-3ε)    | F: 5'-AAACCAUUACAACGAAGUCCCUC-3'<br>R: 5'-GGGAGGGACUUCGUUGAAUGGUUU-3'    |
| NM_020299.4   | AKR1B10               | sequence 1                                                               |
|               |                       | F: 5'-GCUCUUGAACAAACCUUGGACUGAAA-3'<br>R: 5'-UUUCAGUCCAGGUUUGUUAAGAGC-3' |
|               |                       | sequence 2                                                               |
|               |                       | F: 5'-GCCCAGGUUCUGAUCCGUUCCAUA-3'<br>R: 5'-UAUGGAAACGGAUCAGAACCUGGGC-3'  |
| NM_001904.3   | CTNNB1<br>(β-catenin) | F: 5'-CCACAGCUCCUUCUCUGAGUGGUA-3'<br>R: 5'-GGUGCUAUCUGUCUGUCUAGUAAU-3'   |

**Supplementary Table S3: 14-3-3 $\epsilon$ / $\beta$ -catenin increased genes in hepatocellular carcinoma**

| Gene symbol  | Accession no. | Fold changes                  |                                                                  |
|--------------|---------------|-------------------------------|------------------------------------------------------------------|
|              |               | 14-3-3 $\epsilon$ vs. Control | 14-3-3 $\epsilon$ / $\beta$ -catenin siRNA vs. 14-3-3 $\epsilon$ |
| BMPR2        | NM_001204     | 2.08927                       | -2.25281                                                         |
| SNORD58A     | NR_002571     | 2.03351                       | -2.46088                                                         |
| MAP2         | NM_002374     | 2.64114                       | -3.05109                                                         |
| CHI3L1       | NM_001276     | 3.47411                       | -2.34915                                                         |
| MATN3        | NM_002381     | 2.99135                       | -2.38953                                                         |
| AKR1C3       | NM_003739     | 5.75737                       | -2.00836                                                         |
| IL18         | NM_001562     | 19.7617                       | -8.58105                                                         |
| AKR1B10      | NM_020299     | 5.38145                       | -13.1227                                                         |
| SLC7A7       | NM_003982     | 2.40097                       | -2.65859                                                         |
| PTGR1        | NM_001146108  | 2.2573                        | -3.78931                                                         |
| SPARC        | NM_003118     | 3.80172                       | -2.2331                                                          |
| PIP4K2A      | NM_005028     | 2.05739                       | -2.12107                                                         |
| NFE2L2       | NM_006164     | 2.29361                       | -2.25597                                                         |
| RGL1         | NM_015149     | 3.41722                       | -2.2166                                                          |
| LMLN         | NM_001136049  | 2.22254                       | -3.79571                                                         |
| ANKRD1       | NM_014391     | 32.5929                       | -2.44794                                                         |
| IFFO2        | NM_001136265  | 2.61125                       | -2.15042                                                         |
| MAL2         | NM_052886     | 2.11264                       | -3.14979                                                         |
| NOX1         | NM_007052     | 3.82203                       | -2.22099                                                         |
| JAG1         | NM_000214     | 2.18321                       | -2.12992                                                         |
| LOC100134868 | NR_004846     | 3.53102                       | -2.65705                                                         |
| CXCL5        | NM_002994     | 4.25201                       | -2.05789                                                         |
| BCAS1        | NM_003657     | 4.86668                       | -8.11185                                                         |
| CYP24A1      | NM_000782     | 6.1167                        | -2.40276                                                         |
| GBP2         | NM_004120     | 2.00719                       | -2.01949                                                         |
| PDLIM3       | NM_014476     | 2.12958                       | -2.00331                                                         |
| KRT18        | NM_000224     | 2.08964                       | -2.23643                                                         |
| TAGLN2       | NM_003564     | 2.38661                       | -2.00397                                                         |
| LASS6        | NM_203463     | 7.30736                       | -2.24522                                                         |
| PCSK5        | NM_006200     | 2.50404                       | -2.12461                                                         |
| ANXA3        | NM_005139     | 20.2831                       | -4.26316                                                         |
| SS18         | NM_001007559  | 2.18654                       | -2.7797                                                          |
| VIM          | NM_003380     | 12.0352                       | 2.27E-13                                                         |

**Supplementary Table S4: 14-3-3 $\epsilon$ / $\beta$ -catenin decreased genes in hepatocellular carcinoma**

| Gene symbol | Accession no. | Fold changes                  |                                                                  |
|-------------|---------------|-------------------------------|------------------------------------------------------------------|
|             |               | 14-3-3 $\epsilon$ vs. Control | 14-3-3 $\epsilon$ / $\beta$ -catenin siRNA vs. 14-3-3 $\epsilon$ |
| NR6A1       | NM_033334     | -2.28932                      | 2.08922                                                          |
| LOC401357   | AK125790      | -3.08758                      | 2.82648                                                          |
| LOC646870   | AK130460      | -2.39141                      | 2.64155                                                          |
